# Supplementary material for: Honokiol blocks tumor development and metastasis through mitochondrion-targeted effects
Source: Springer Nature journal article supplement (doi:10.1038/s41419-026-08441-6), 2026-01-30

**FIGURE 1A**

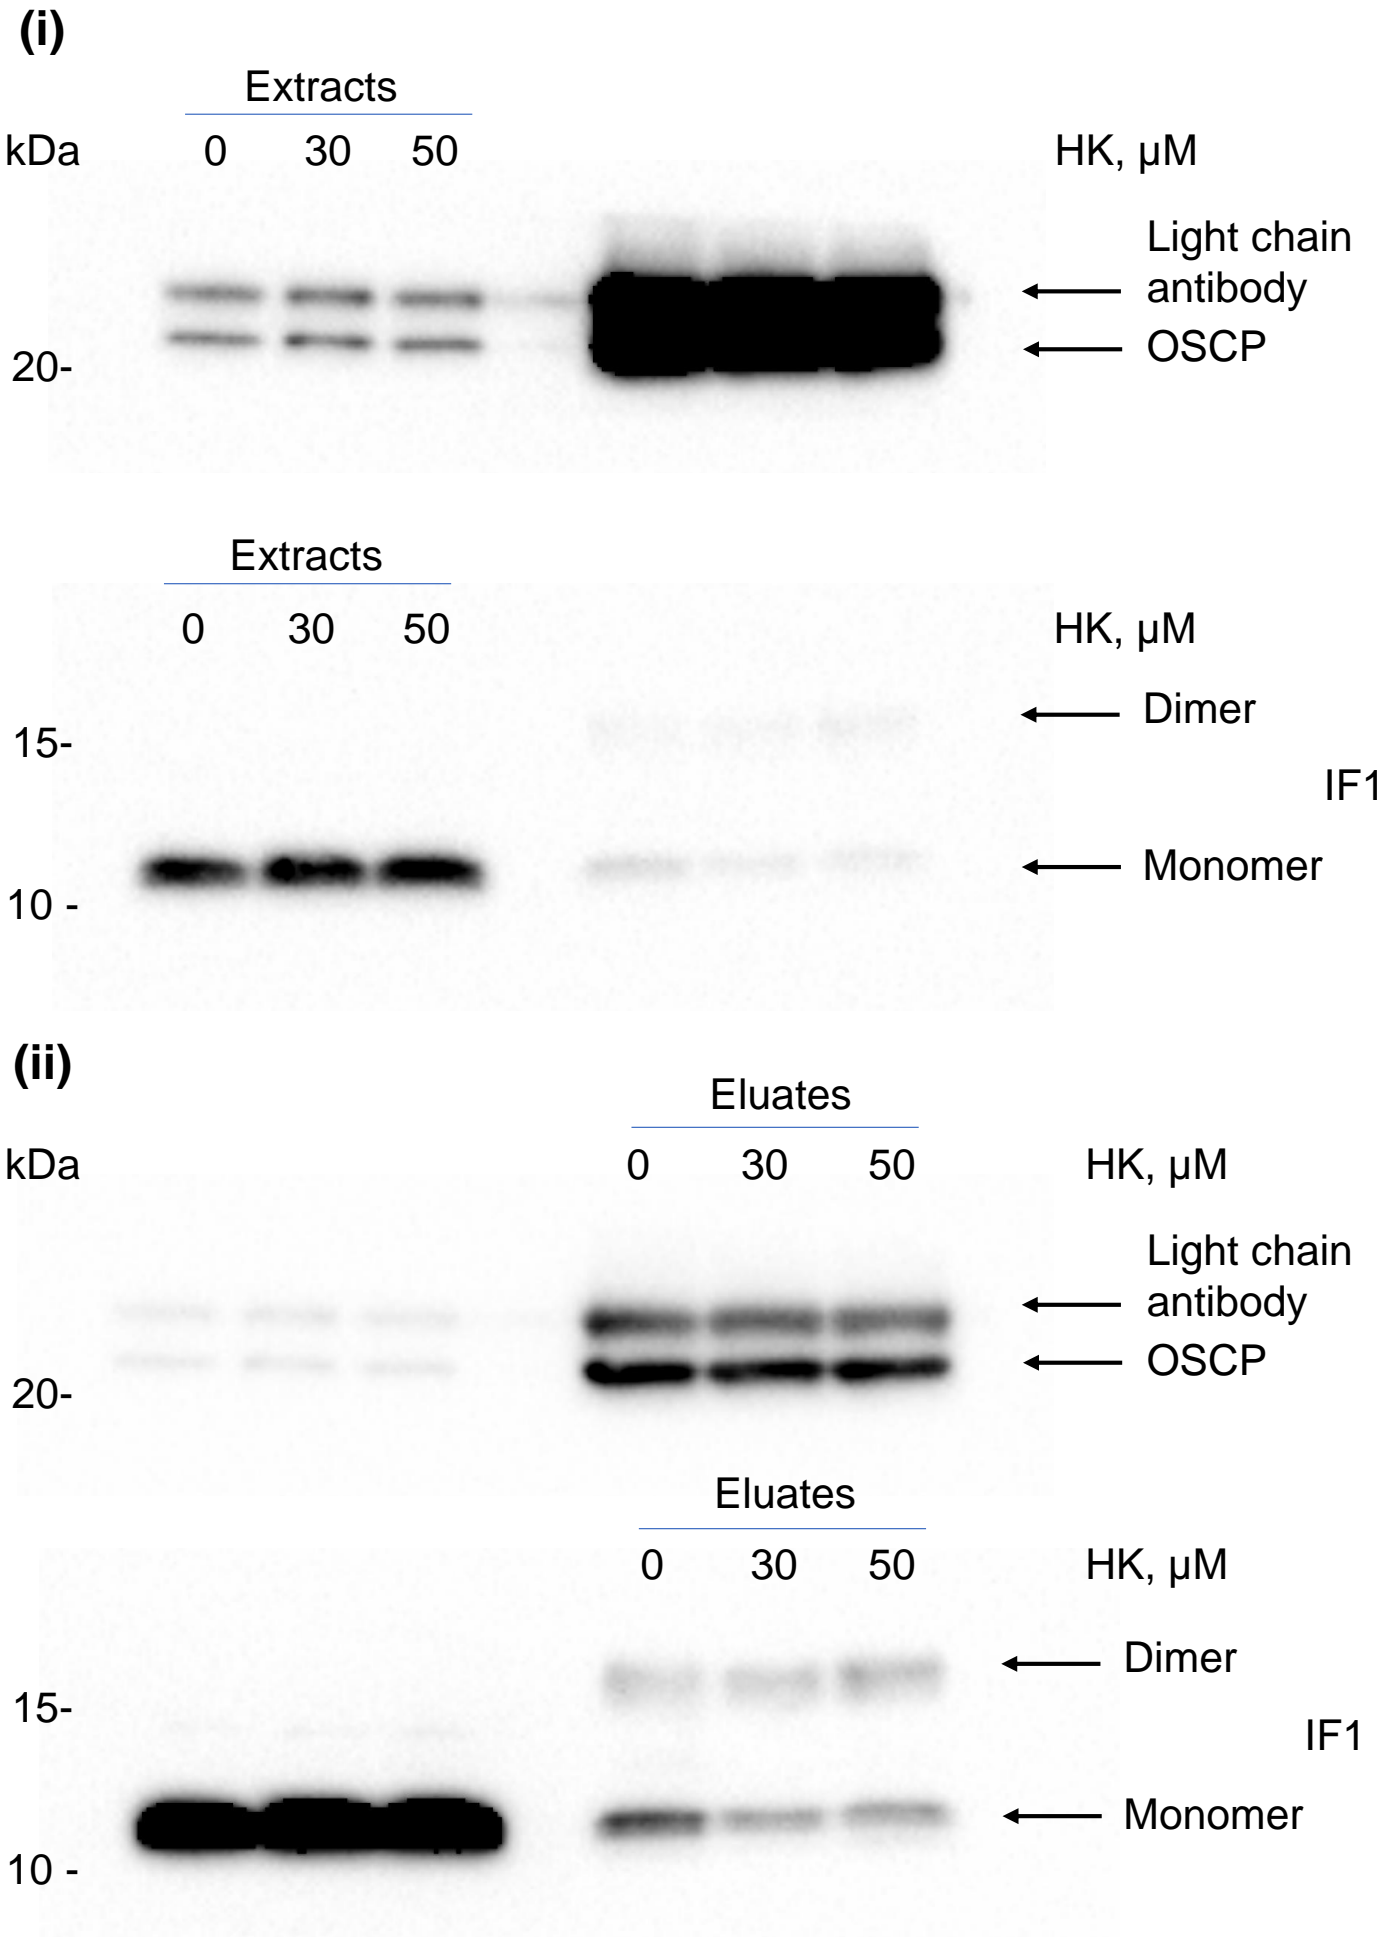

**FIGURE 1B**

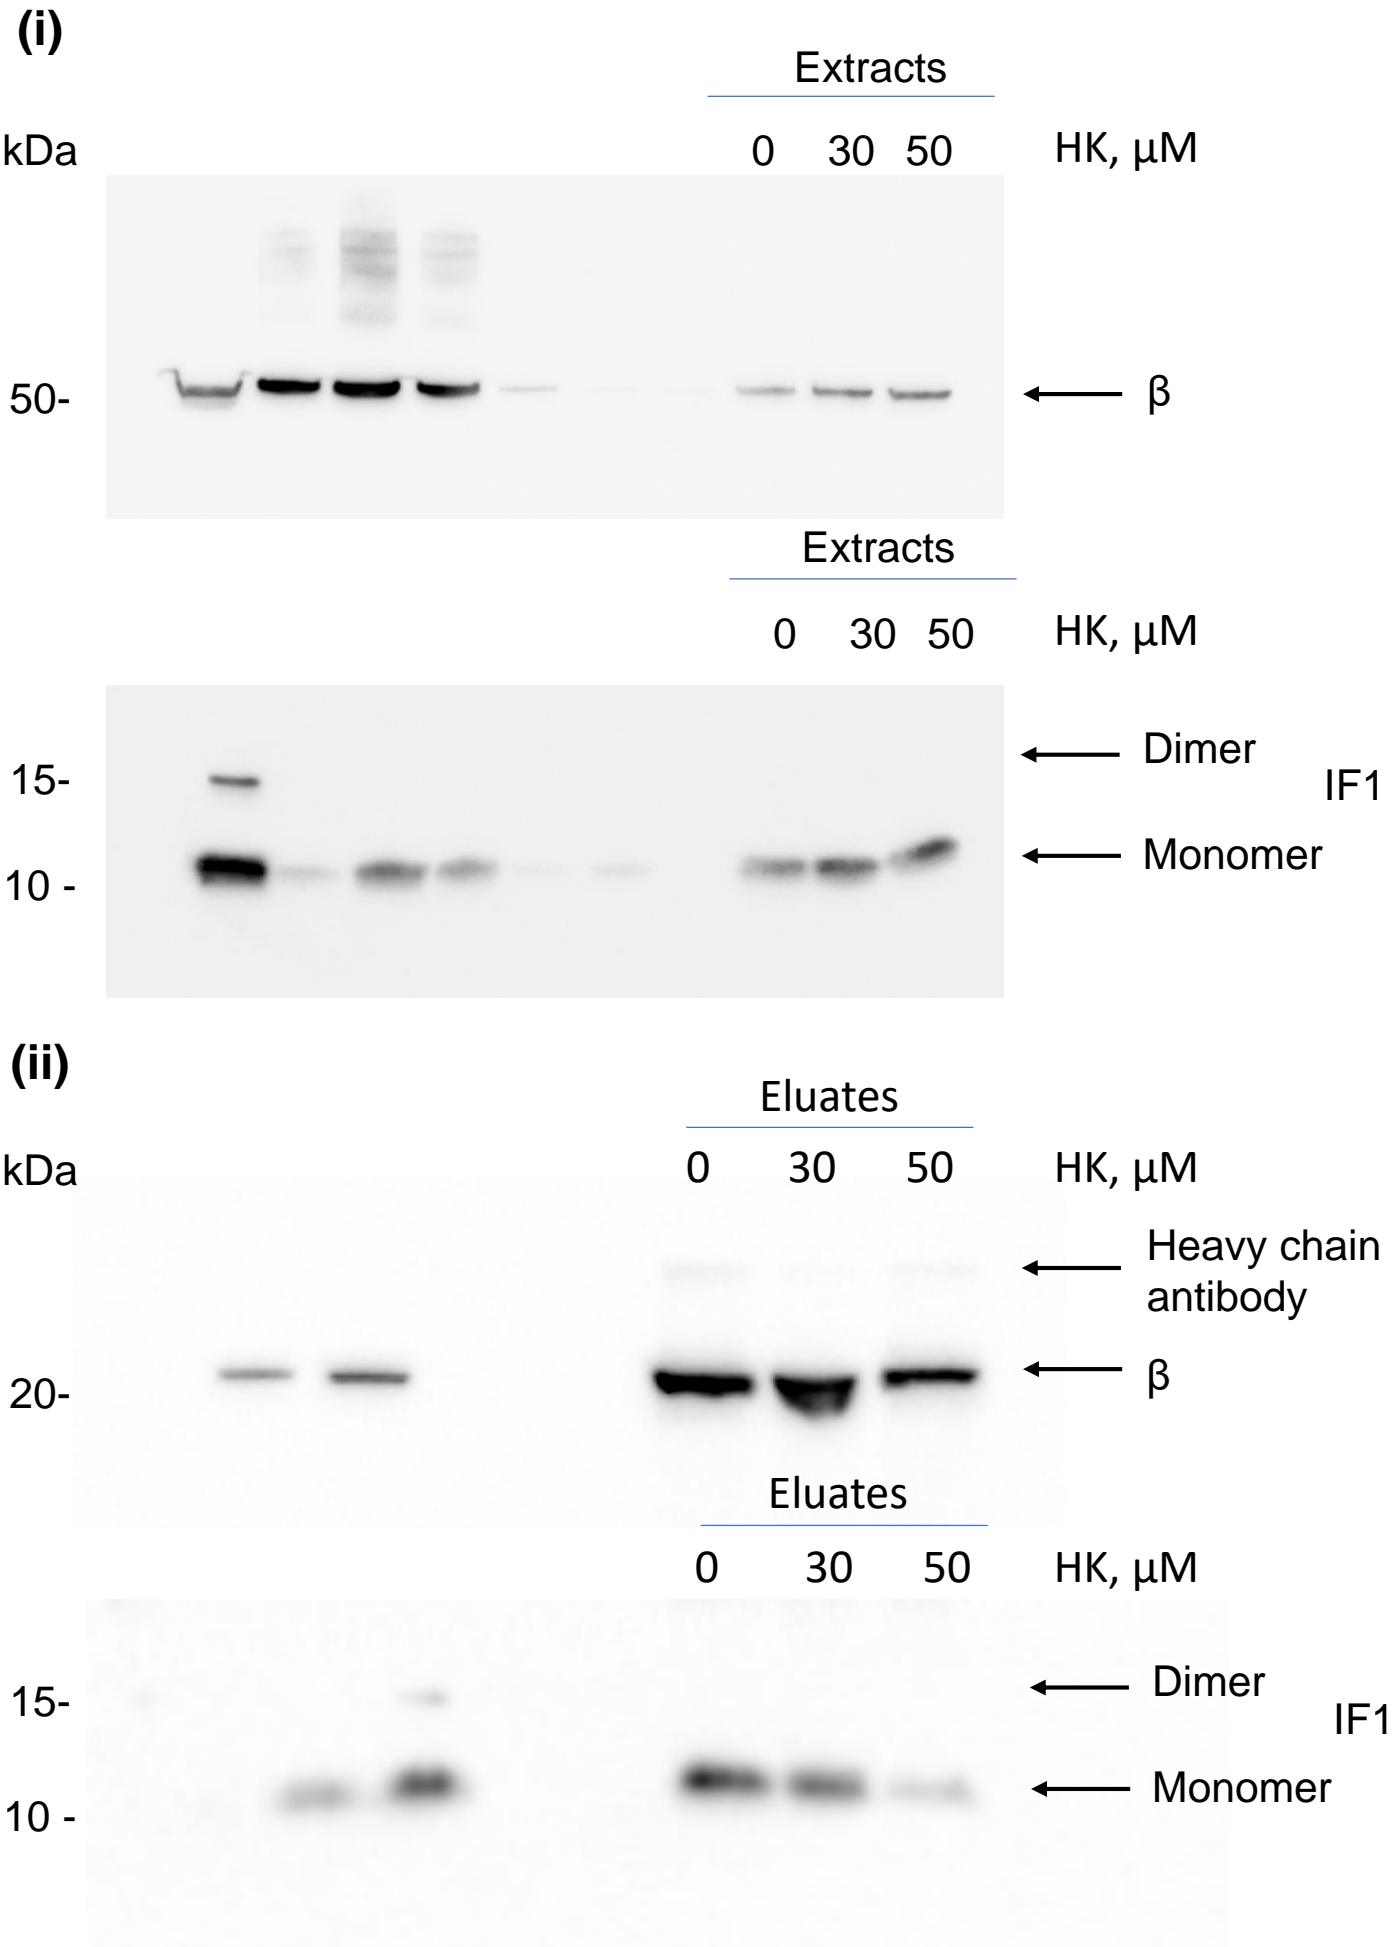

**FIGURE 5C**

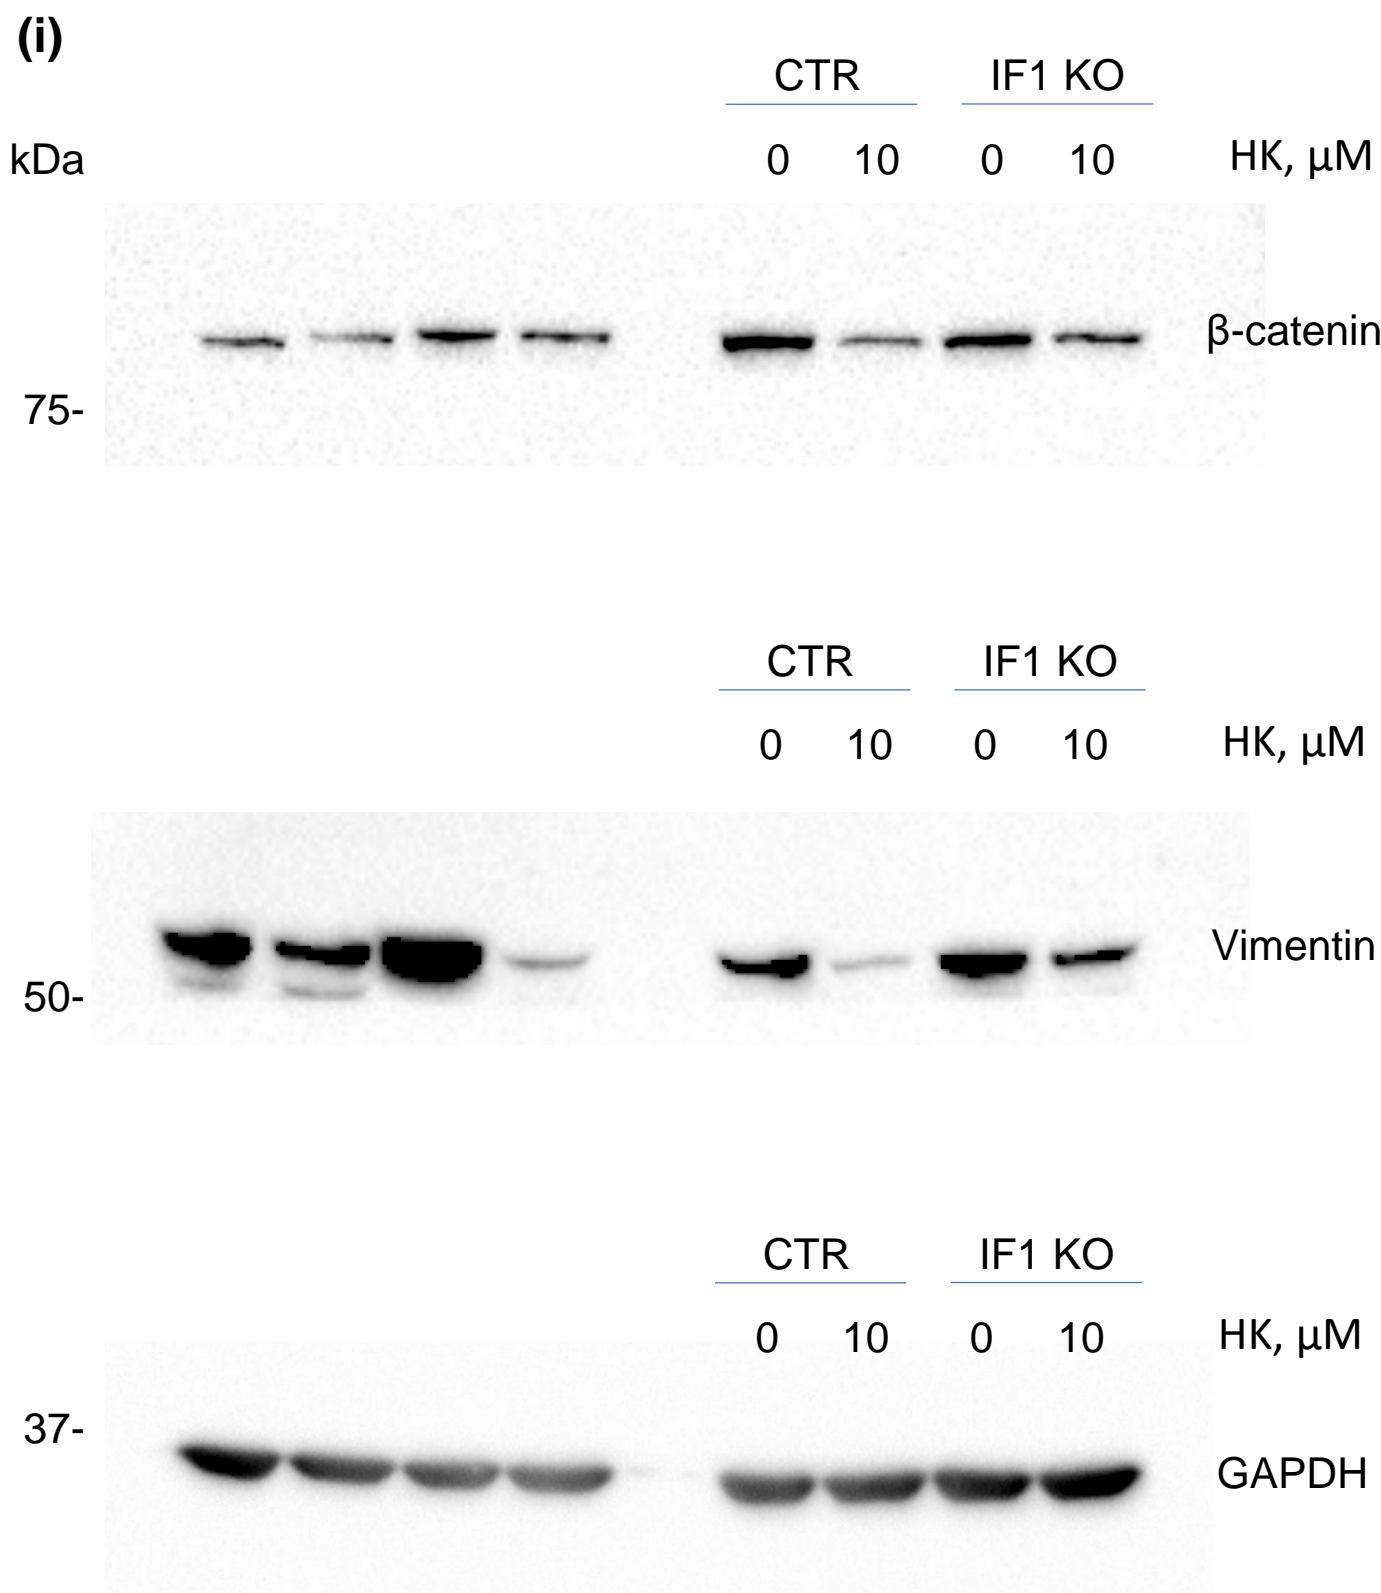

SUPPLEMENTARY FIG. 3A

(i)

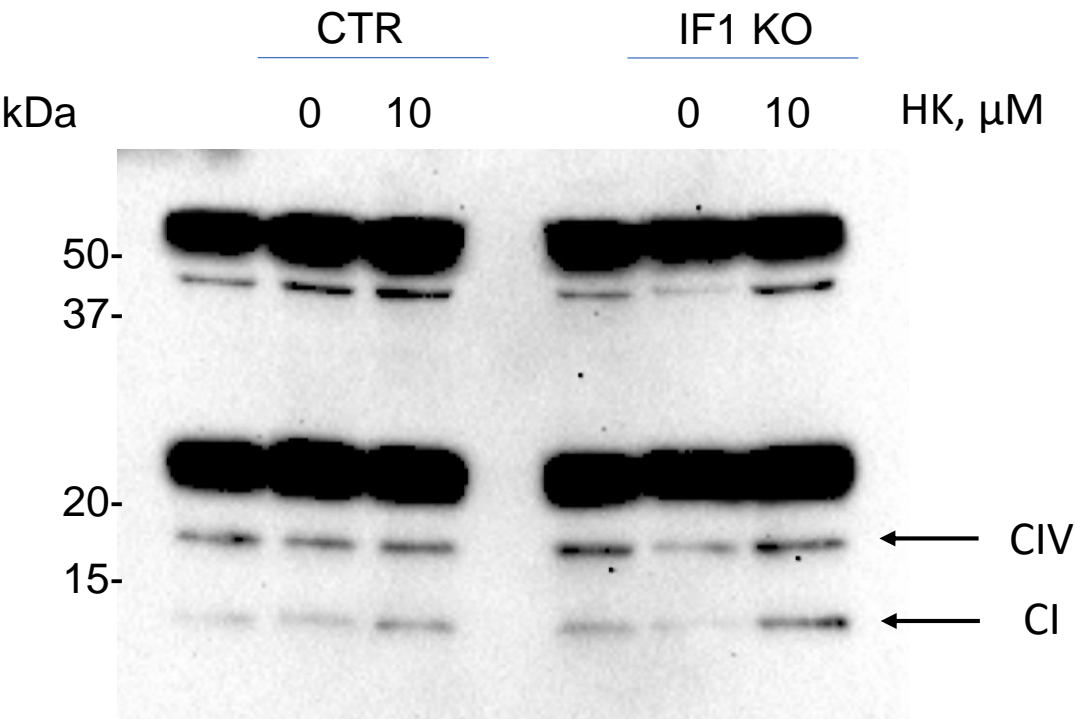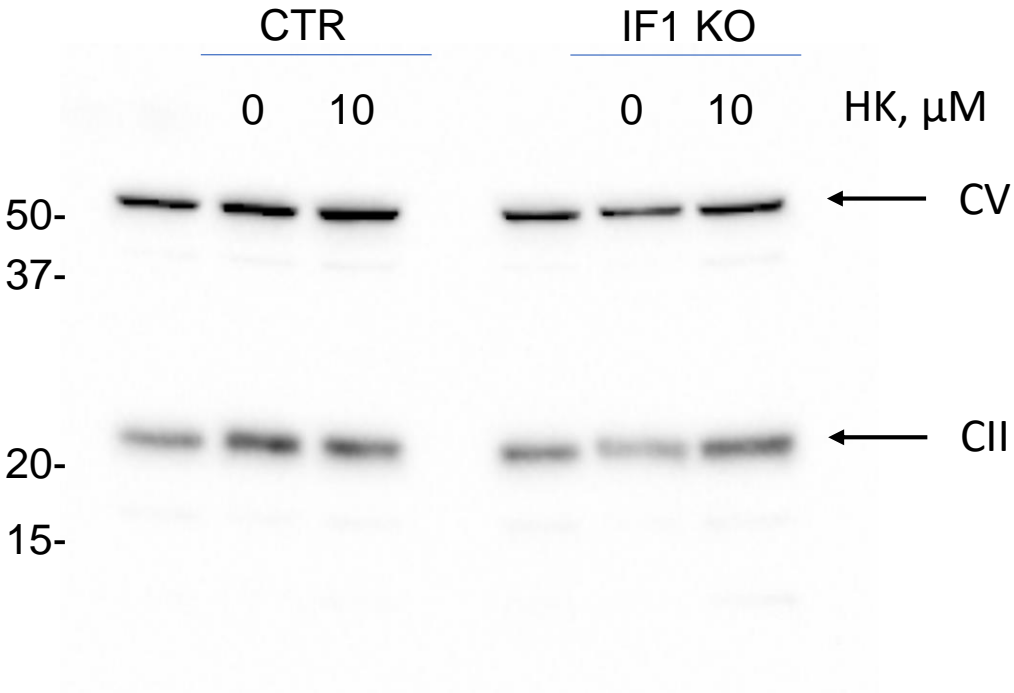

SUPPLEMENTARY FIG. 3A

(i)

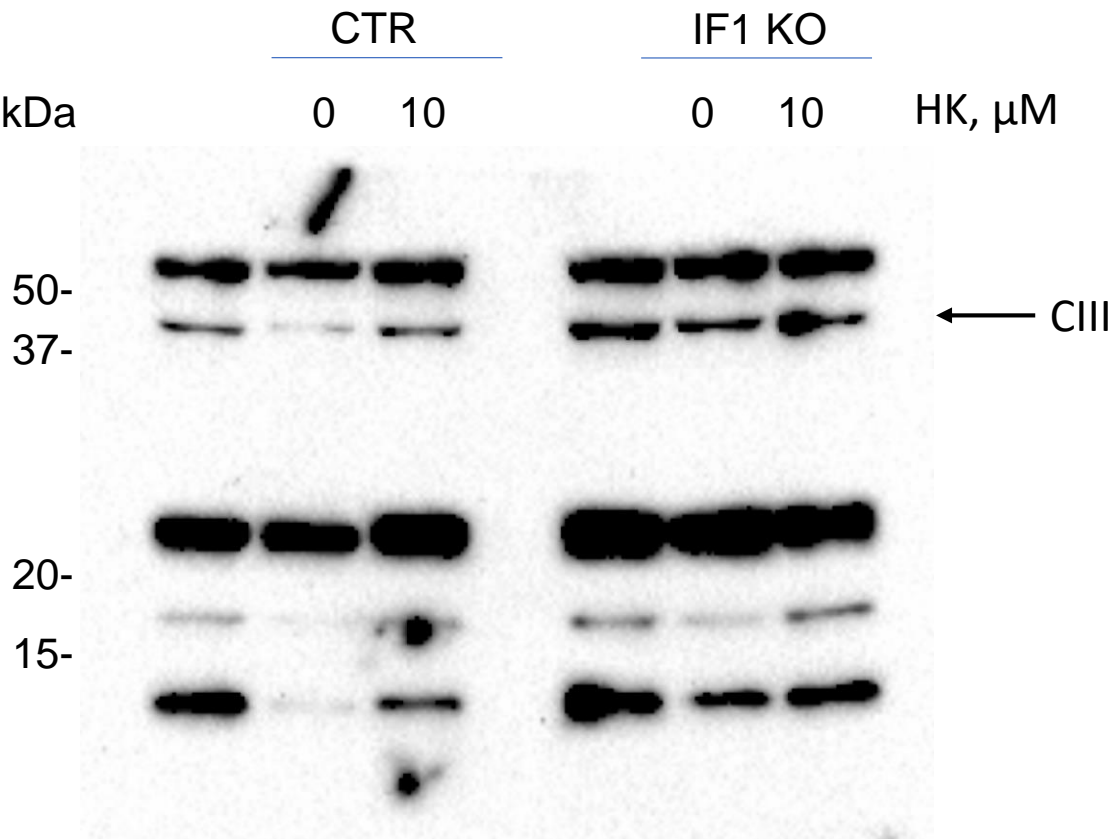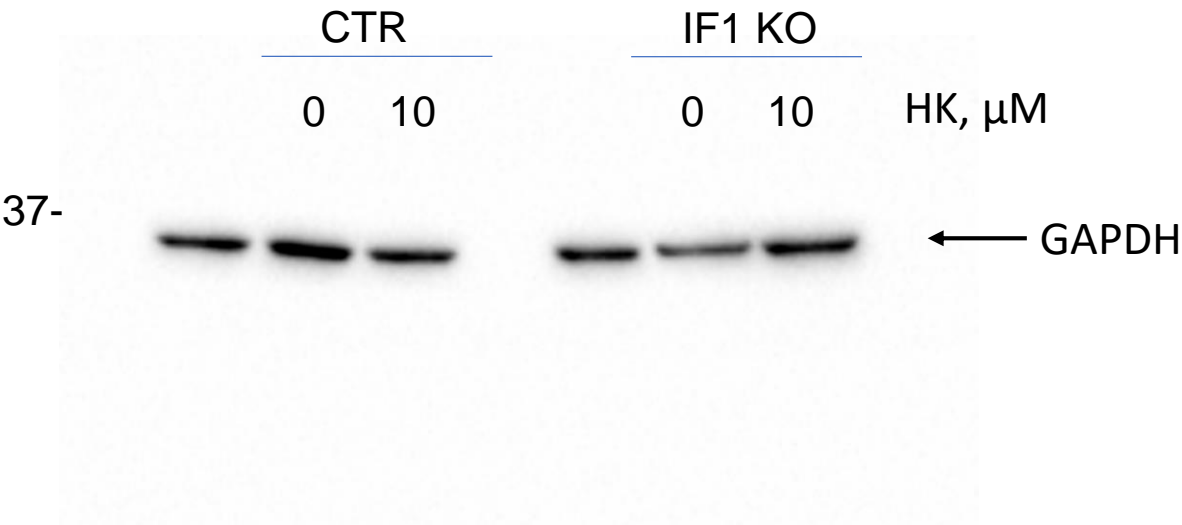

SUPPLEMENTARY FIG. 3B

(i)

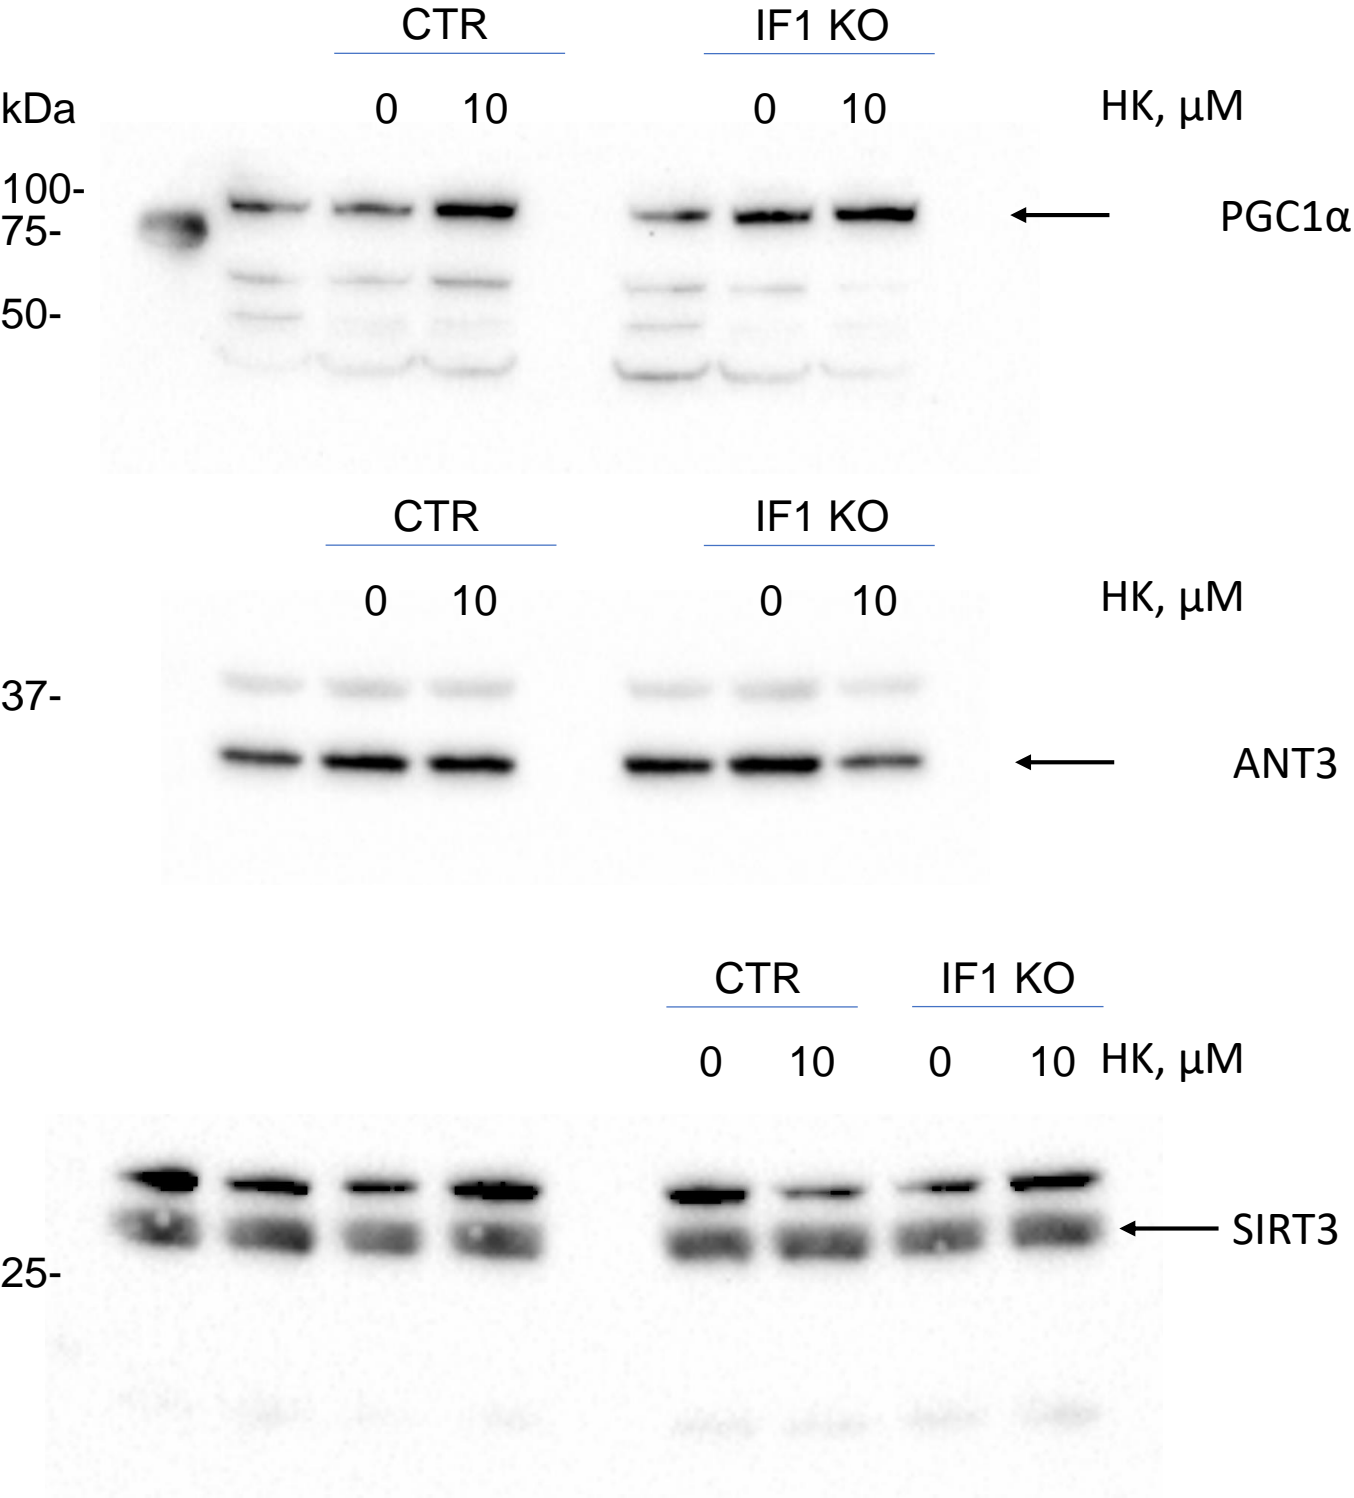

SUPPLEMENTARY FIG. 3B

(i)

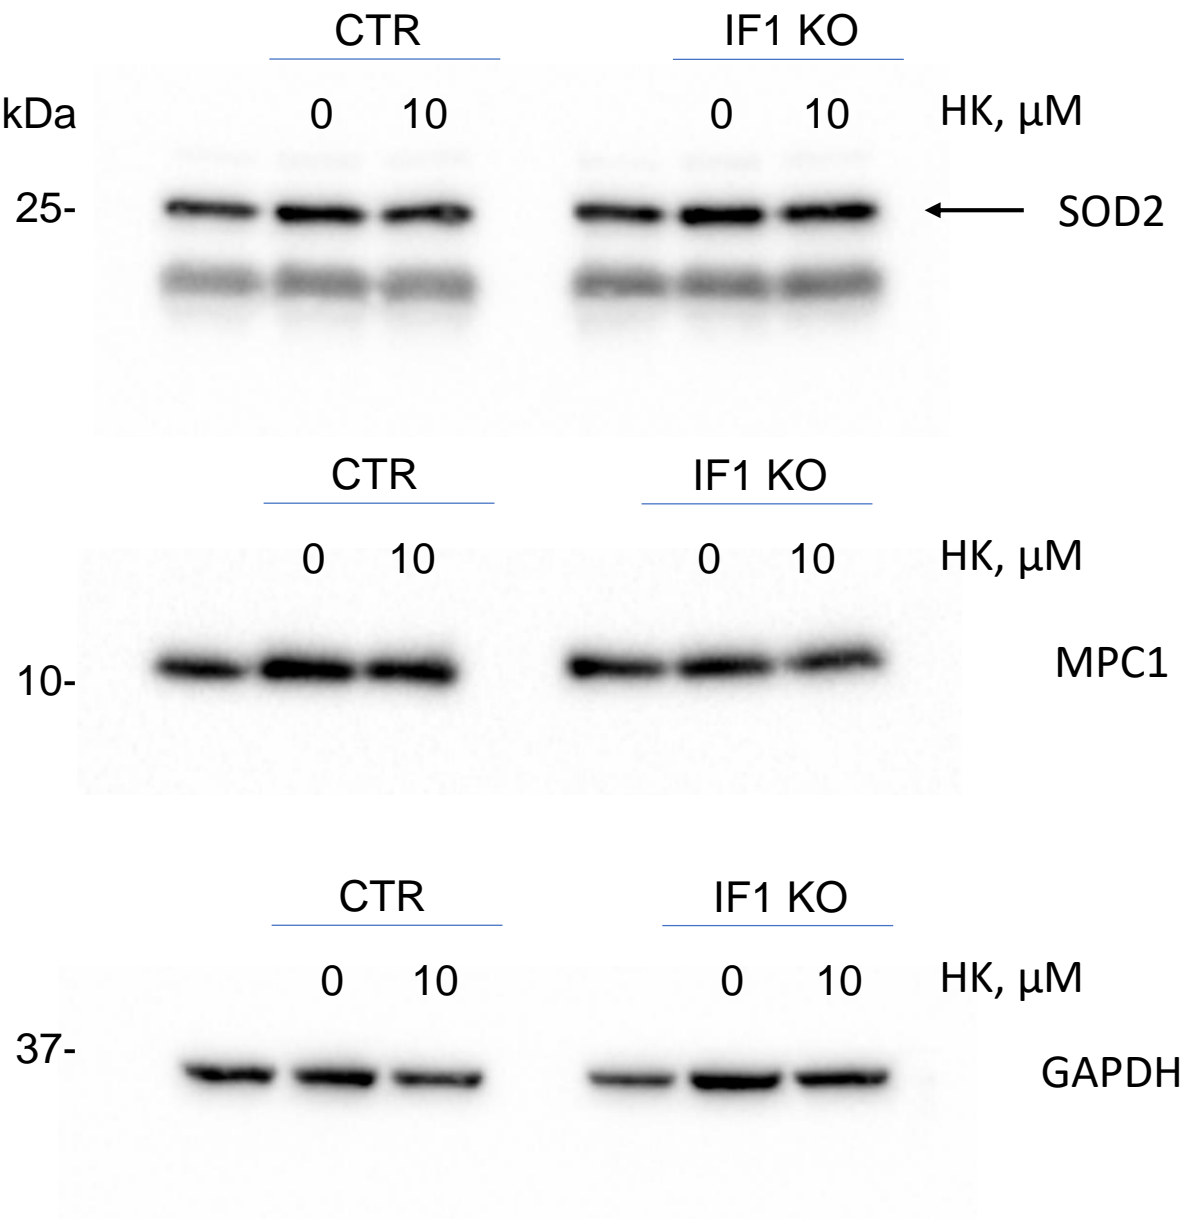

SUPPLEMENTARY FIG. 3C

(i)

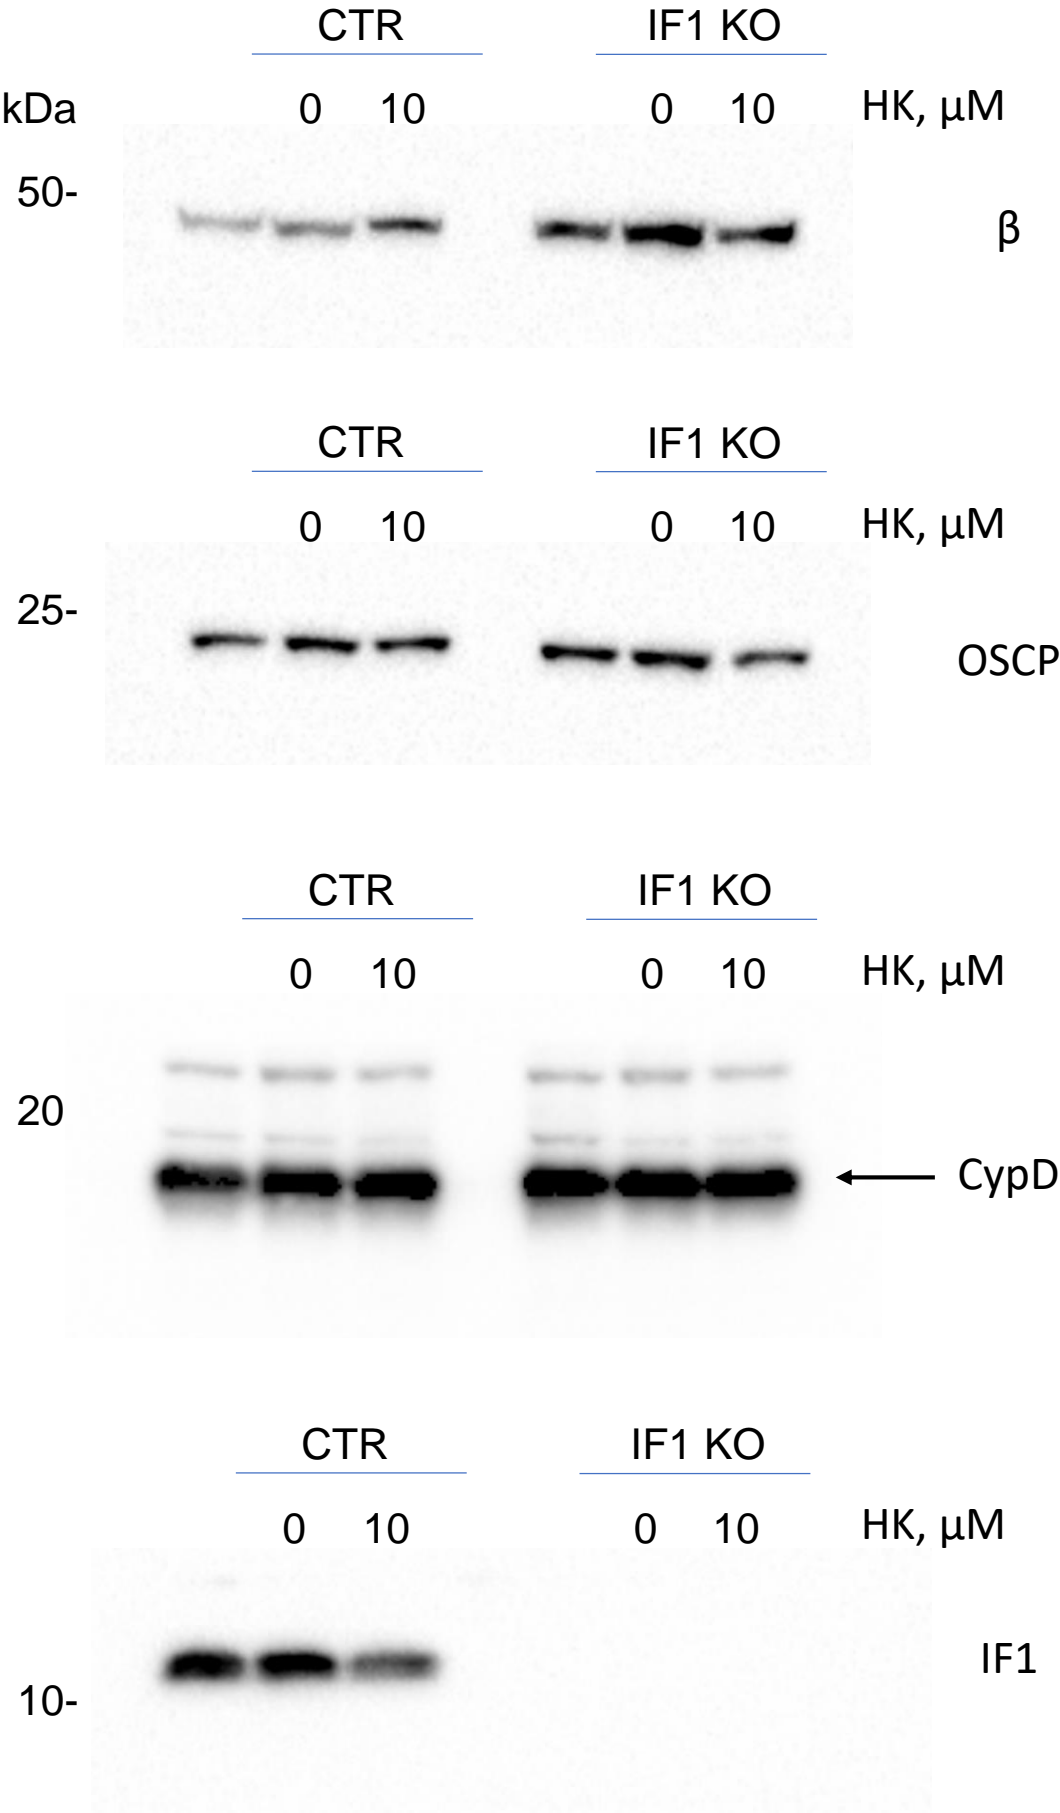



SUPPLEMENTARY FIG. 3C

(i)

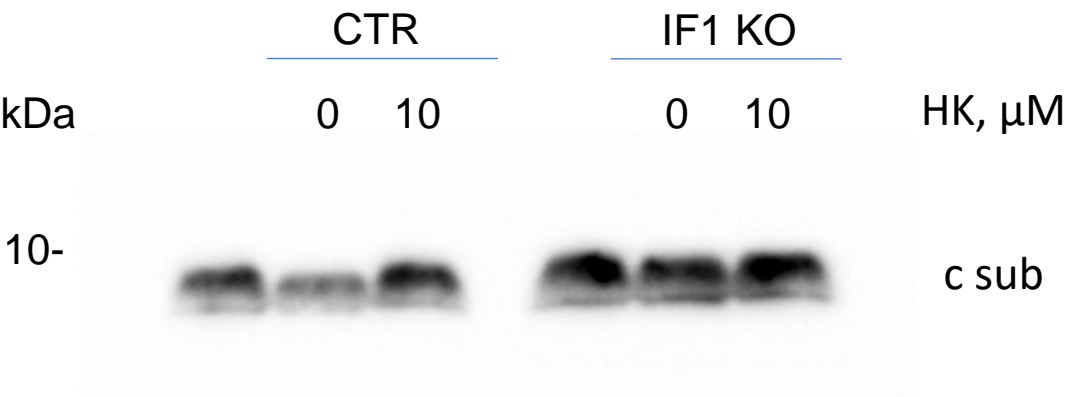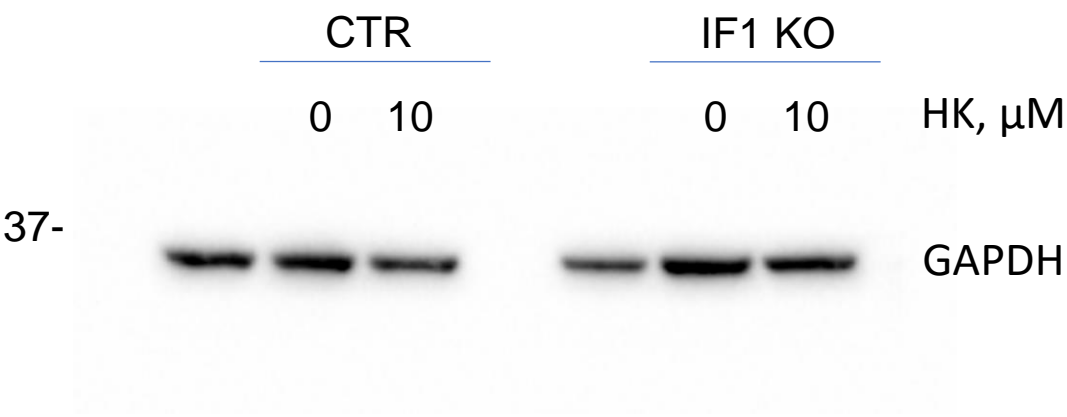

Supplement: MOESM10 [file 41419_2026_8441_MOESM10_ESM.pdf › 41419_2026_8441_MOESM10_ESM.pdf]
